# Supplementary material
Source: MDPI journal article supplement (https://www.mdpi.com/2073-4395/11/5/953)
Supplement: s1 [file s1]

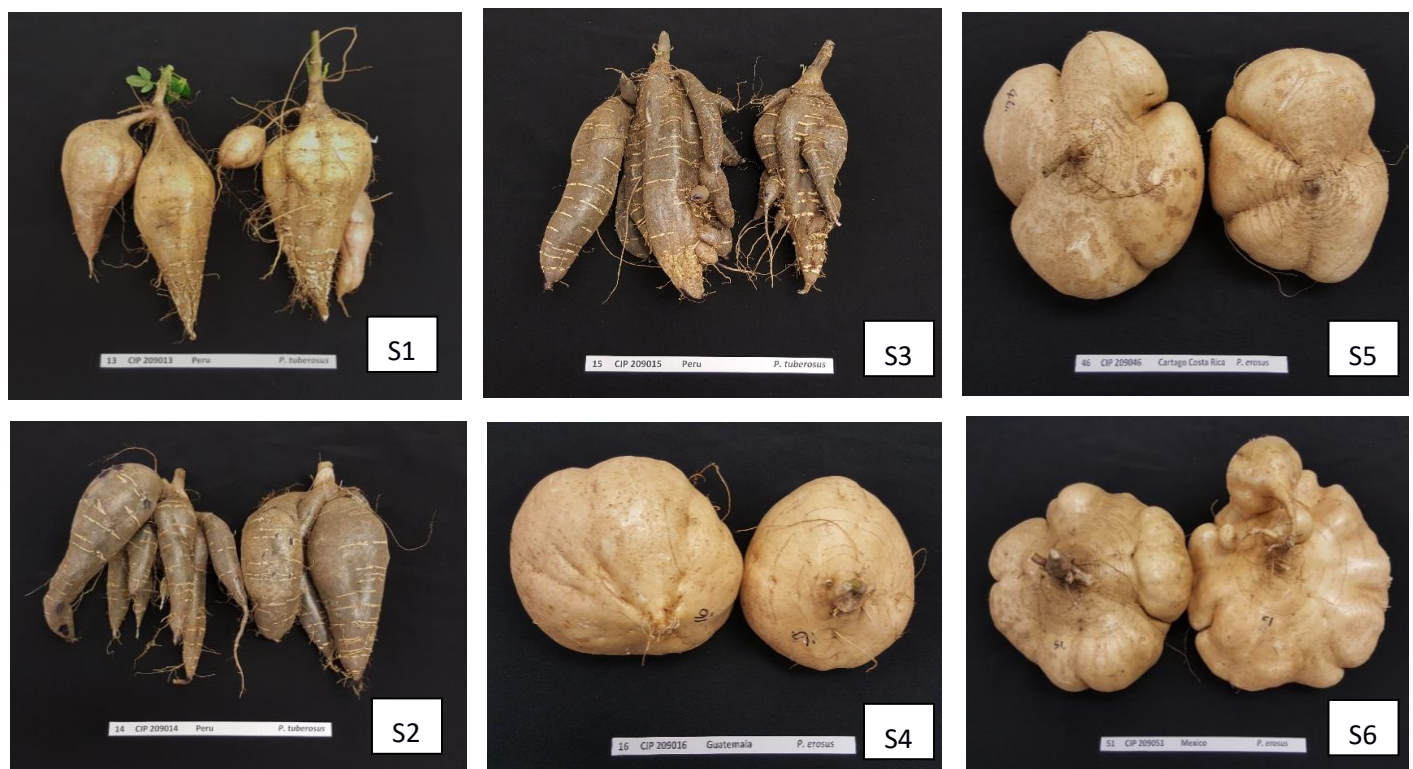

**Figure S1.** Yam bean root images including the origin and accession numbers of each cultivar, which were grown and investigated at the University of Western Australia. S1) *P. tuberosus* (Pt-CIP-209013) from Peru. S2) *P. tuberosus* (Pt-CIP-209014) from Peru. S3) *P. tuberosus* (Pt-CIP-209015) from Peru. S4) *P. erosus* (Pe-CIP-209016) from Guatemala. S5) *P. erosus* (Pe-CIP-209046) from Cartago Costa Rica. S6) *P. erosus* (Pe-CIP-209051) from Mexico.

**Table S1.** Assembly statistics of the yam bean genome assembled by MaSuRCA 3.2.2. N50 of the assembly was 6687 across 18,412 sequences.

|                | Average bp  | Number of sequences (n=) |
|----------------|-------------|--------------------------|
| N50            | 18,412      | 6687                     |
| N60            | 13,530      | 9590                     |
| N70            | 8991        | 13,736                   |
| N80            | 4712        | 20,673                   |
| N90            | 1301        | 39,256                   |
| N100           | 300         | 127,163                  |
| Total sum      | 460,035,745 | 127,163                  |
| Predicted size | 550Mbp      | N/A                      |

**Table S2.** The BUSCO (Benchmarking Universal Single-Copy Orthologs) analysis results for the yam bean MaSuRCA assembly.

|                       | <b>Number of BUSCO hits</b>                  | <b>Percentage of Total BUSCOs</b>            |
|-----------------------|----------------------------------------------|----------------------------------------------|
| Complete BUSCOs       | 1255<br>(1197 single-copy and 58 duplicated) | 87.1 (83.1% single-copy and 4.0% duplicated) |
| Fragmented BUSCOs     | 74                                           | 5.1                                          |
| Missing BUSCOs        | 111                                          | 7.8                                          |
| Total BUSCOs searched | 1440                                         | N/A                                          |

**Table S3.** The singleton/non-duplicated statistics of the yam bean genome assembled by MaSuRCA 3.2.2. compared to other six other Pachyrhizus cultivars using bcftools.

|                       | <b>Number of BUSCO hits</b>                  | <b>Percentage of Total BUSCOs</b>            |
|-----------------------|----------------------------------------------|----------------------------------------------|
| Complete BUSCOs       | 1255<br>(1197 single-copy and 58 duplicated) | 87.1 (83.1% single-copy and 4.0% duplicated) |
| Fragmented BUSCOs     | 74                                           | 5.1                                          |
| Missing BUSCOs        | 111                                          | 7.8                                          |
| Total BUSCOs searched | 1440                                         | N/A                                          |
